# Supplementary material for: QTL mapping reveals a tight linkage between QTLs for grain weight and panicle spikelet number in rice
Source: PubMed Central journal article supplement (PMC4883721; doi:10.1186/1939-8433-6-33), 2013-11-28
Supplement: 12284_2013_66_MOESM1_ESM.pdf [file 12284_2013_66_MOESM1_ESM.pdf]

Hwayeongbyeo  $\times$  W1944

$F_1 \times$  Hwayeongbyeo

14 ( $BC_1F_6$ ) RILs  $\times$  Hwayeongbyeo

$BC_2F_1 \times$  Hwayeongbyeo

$BC_3F_1$

CR6 ( $BC_3F_4$ )  $\times$  Hwayeongbyeo

457  $BC_4F_2$  plants (2007)

434  $BC_4F_3$  plants from one  $BC_4F_2$  plant (2008)

CR7111-30 ( $BC_4F_3$ )  $\times$  Hwayeongbyeo

326  $BC_5F_2$  plants (2009)

26  $BC_5F_3$  lines (2010)

18  $BC_5F_4$  lines (2011)
