# Supplementary material for: QTL mapping reveals a tight linkage between QTLs for grain weight and panicle spikelet number in rice
Source: PubMed Central journal article supplement (PMC4883721; doi:10.1186/1939-8433-6-33), 2013-11-28

A)

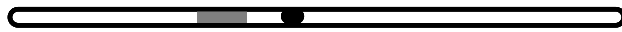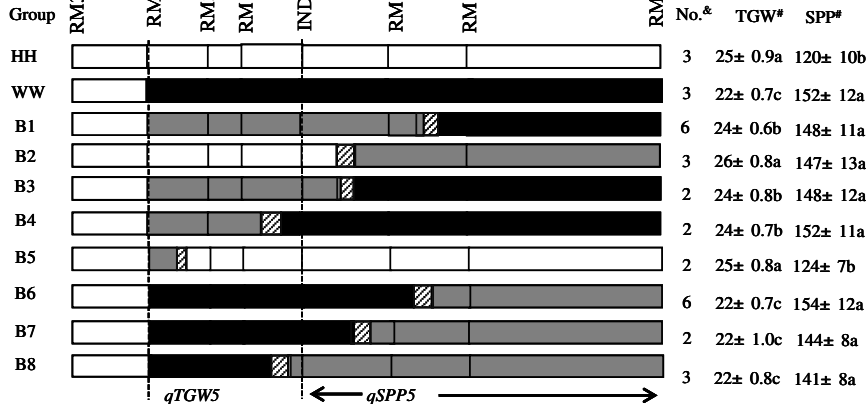

B)

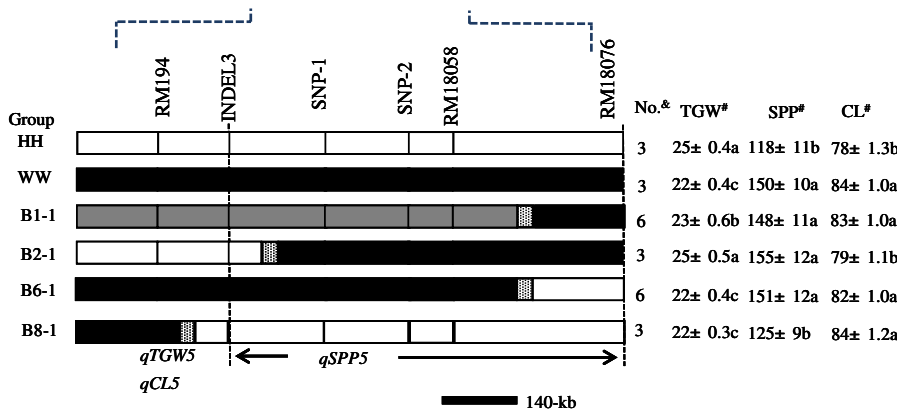

Supplement: 12284_2013_66_MOESM4_ESM.pdf [file 12284_2013_66_MOESM4_ESM.pdf]
